# Supplementary material for: Development of a soil biological quality index for soils of semi-arid tropics
Source: Copernicus journal article supplement (doi:10.5194/soil-6-483-2020), 2020-10-09
Supplement: Supplementary file 1 [file soil-6-483-2020-supplement.zip]

Archive with 3 entries (3 files):
- Aravind_Spreadsheets for all SBQI.xlsx
- soil-6-483-2020-supplement-title-page.pdf
- Aravind_et_al_Supplementary Tables.docx
