# Supplementary material for: Development of a soil biological quality index for soils of semi-arid tropics
Source: Copernicus journal article supplement (doi:10.5194/soil-6-483-2020), 2020-10-09
Supplement: Supplementary file 1 [file soil-6-483-2020-supplement.zip › Aravind_et_al_Supplementary Tables.docx]

Supplementary Table S1. Details of the farmers’ fields used in the present study to evaluate the soil biological quality index

| Sample ID | Village name | District sub-division | Soil type | Soil colour | Geographical coordinates | | crop | Previous crop | Fertilizer Applied |
| --- | --- | --- | --- | --- | --- | --- | --- | --- | --- |
| Latitude | Longitude |
| A | Kalikanaickenpalayam | Perur | Sandy loam | Brown | 11˚08ˈ05 ˈ̎N | 76˚51ˈ33 ˈ̎E | Lab lab | Banana | Urea, MOP, DAP, CaNO3, FYM (Goat manure), Sunhemp |
| B | Thaliyur | Perur | Sandy loam | Brown | 10˚59ˈ49 ˈ̎N | 76˚51ˈ02 ˈ̎E | Banana | Banana | Only FYM (Cow manure) |
| C | Vandikaranoor pirivu | Perur | Sandy loam | Dark Brown | 10˚59ˈ53 ˈ̎N | 76˚49ˈ48 ˈ̎E | Banana | Onion + Turmeric | Urea, MOP, DAP, FYM (Cow manure), Sunhemp |
| D | Devarayapuram | Perur | Clayey loam | Dark Brown | 10˚59ˈ58 ˈ̎N | 76˚48ˈ25 ˈ̎E | Onion | Radish | Urea, MOP,DAP, FYM (Cow manure) |
| E | Pullakoundanpudur | Perur | Sandy loam | Dark Brown | 11˚0ˈ11 ˈ̎N | 76˚48ˈ17 ˈ̎E | Maize | Tomato | All19 (NPK), DAP, Urea, Sulphate of potash, FYM(Poultry manure) |
| F | Vellarughampalayam | Perur | red sandy loam | Bright Red | 11˚0ˈ21 ˈ̎N | 76˚47ˈ32 ˈ̎E | Turmeric + Onion | Tomato + Brinjal | DAP, Factomphos, FYM(Cow manure + Poultry manure) |
| G | Viraliyur | Perur | Sandy loam | Brown | 11˚0ˈ20 ˈ̎N | 76˚47ˈ16 ˈ̎E | Onion | Cow pea | Urea, DAP, Neem cake, All 19, MAP,SOP, FYM (Cow manure+ Poultry manure) |
| H | Vellimalaipattinam | Perur | Sandy loam | Blackish | 11˚0ˈ22 ˈ̎N | 76˚46ˈ51 ˈ̎E | Tomato | Maize | Urea, DAP, Factomphos , All 19, MAP, FYM (Cow manure) |
| I | Pooluvapatti | Perur | Clayey loam | Black | 10˚58ˈ32ˈ̎N | 76˚49ˈ15 ˈ̎E | Okra | Cauliflower | Urea, DAP, MOP,SSP,FYM (Cow manure + Dhaincha) |
| J | Srinivasapuram | Thondamuthur | Clayey loam | Black | 10˚57ˈ26ˈ̎N | 76˚47ˈ34 ˈ̎E | Tomato | Onion | Urea, DAP, Factomphos, All 19, FYM (Cow manure) |
| K | Nanthavanathottam | Thondamuthur | Loamy sand | Yellowish Brown | 10˚57ˈ19ˈ̎N | 76˚44ˈ31 ˈ̎E | Tomato | Onion | Urea, DAP, CN (Calcium nitrate), FYM (Cow manure+ Poultry manure) |
| L | Maduvarayapuram | Thondamuthur | Sandy loam | Brown | 10˚57ˈ41ˈ̎N | 76˚44ˈ03 ˈ̎E | Chilli | No crop | All 19, DAP, FYM (Cow manure) |
| M | Maduvarayapuram | Thondamuthur | Sandy loam | Reddish Brown | 10˚57ˈ41ˈ̎N | 76˚45ˈ31 ˈ̎E | Tomato | Chilli | Urea, DAP, FYM (Cow manure) |
| N | Kallipalayam | Thondamuthur | Sandy loam | Brown | 10˚57ˈ45ˈ̎N | 76˚48ˈ40 ˈ̎E | Onion | Tomato | Urea, DAP, All 19, SSP, FYM (Poultry manure) |
| O | Iruttupallam | Thondamuthur | Sandy loam | Blackish | 10˚56ˈ23ˈ̎N | 76˚43ˈ47 ˈ̎E | Maize | No crop | Urea, DAP, MOP, FYM (Cow manure) |
| P | Iruttupallam | Thondamuthur | Sandy loam | Blackish | 10˚56ˈ23ˈ̎N | 76˚44ˈ51 ˈ̎E | Onion | Coriander | Urea, DAP, SSP, FYM (Poultry manure) |
| Q | Semmedu | Thondamuthur | Sandy loam | Blackish Brown | 10˚95ˈ66ˈ̎N | 76˚75ˈ39 ˈ̎E | Maize | Maize | Urea, DAP, SOP, MOP, FYM (Cow manure) |
| R | Elanurthottam | Thondamuthur | Sandy loam | Red | 10˚93ˈ96ˈ̎N | 76˚80ˈ54 ˈ̎E | Cabbage | No crop | Urea, DAP, CN(Calcium nitrate), MOP, FYM (Cow manure) |
| S | Naraseepuram | Thondamuthur | Sandy loam | Bright Brown | 10˚59ˈ23ˈ̎N | 76˚47ˈ12 ˈ̎E | Cowpea | Onion | Urea, DAP, MOP, FYM (manure) |
| T | Devarayapuram | Perur | Sandy loam | Brown | 10˚58ˈ25ˈ̎N | 76˚49ˈ07 ˈ̎E | Onion | Dhaincha | Urea, DAP, All 19,MOP, FYM (Cow manure + Poultry manure) |
| U | Atti | Ooty | red sandy loam | Deep Red | 11˚48ˈ91ˈ̎N | 76˚82ˈ96 ˈ̎E | Lettuce | Celery | All 17(N:P:K), DAP,MOP,FYM (Cow manure) |
| V | Kookalthorai | Ooty | red sandy loam | Deep Red | 11˚49ˈ07ˈ̎N | 76˚83ˈ06 ˈ̎E | Beetroot | Broccoli | DAP, All 17(N:P:K), FYM (Cow manure) |
| W | Atti | Ooty | red sandy loam | Deep Red | 11˚48ˈ93ˈ̎N | 76˚83ˈ65 ˈ̎E | Carrot | Beetroot | DAP, Complex fertilizer mixture, FYM (Cow manure) |
| X | Kookalthorai | Ooty | red sandy loam | Deep Red | 11˚50ˈ27ˈ̎N | 76˚84ˈ02ˈ̎E | parsley | Broccoli | DAP,SOP, Complex fertilizer mixture, FYM (Cow manure) |
| Y | Kookalthorai | Ooty | red sandy loam | Deep Red | 11˚49ˈ45ˈ̎N | 76˚83ˈ51ˈ̎E | Potato | Lettuce | DAP, All 17(N:P:K), FYM (Cow manure) |

Supplementary Table S2. Loading value and per cent contribution of assessed soil variables on the axis identified by the principal component analysis

| Soil variables | PC1 | | PC2 | |
| --- | --- | --- | --- | --- |
| Factor loading | % contribution | Factor loading | % contribution |
| SOC | **0.92** | 18.64 | 0.35 | 9.86 |
| MBC | **0.97** | 21.01 | 0.12 | 1.23 |
| SLC | **0.93** | 19.22 | -0.34 | 9.25 |
| SPI | 0.43 | 4.02 | **0.89** | 64.75 |
| DHA | **0.88** | 17.25 | -0.40 | 12.71 |
| SIR | **0.95** | 19.88 | -0.16 | 2.20 |
| Eigenvalue | 4.51 | | 1.23 | |
| Variability (%) | 75.21 | | 20.48 | |
| Cumulative % | 75.21 | | 95.68 | |

SOC – Soil organic carbon; MBC – Microbial biomass carbon; SLC – Soil labile carbon; SPI – Soil protein index; DHA – Dehydrogenase; SIR – Substrate induced respiration. Values in bold explained >80% contribution to the significant component.
