# Supplementary material for: Development of a soil biological quality index for soils of semi-arid tropics
Source: Copernicus journal article supplement (doi:10.5194/soil-6-483-2020), 2020-10-09
Supplement: Supplementary file 1 [file soil-6-483-2020-supplement.zip › Aravind_Spreadsheets for all SBQI.xlsx]

## Sheet: SBQI1
		Actual values						Soil Index scales
Treatments	Rep.	SOC	MBC	SLC	SPI	DHA	SIR	SOC	MBC	SLC	SPI	DHA	SIR	SUM_SCORE	Simple SQI	SBQI1	SD
C_Control	1	64	1711.11	339.48	5.1	4.63	2.18	2	2	3	1	1	2	11	4.58333
C_Control	2	50	488.89	264.74	4.93	6.06	2.02	1	1	2	1	1	2	8	3.33333
C_Control	3	56	733.33	232.05	5.34	5.23	1.8	1	1	2	1	1	2	8	3.33333
C_Control	4	53	1955.56	171.32	5.38	5.15	2.84	1	2	2	1	1	2	9	3.75
C_Control	5	47	1466.67	255.4	5.27	5.75	2.73	1	2	2	1	1	2	9	3.75
C_Control	6	53	2444.44	157.31	5.68	4.87	2.84	1	2	2	1	1	2	9	3.75
C_Control	7	56	488.89	194.68	5.42	5.04	2.29	1	1	2	1	1	2	8	3.33333
C_Control	8	64	244.44	213.36	5.34	5.1	2.46	2	1	2	1	1	2	9	3.75
C_Control	9	47	244.44	222.71	5.55	5.4	2.4	1	1	2	1	1	2	8	3.33333	3.65741	0.404927
C_IC	1	76	1466.67	334.81	5.6	7.35	2.67	2	2	3	1	1	2	11	4.58333
C_IC	2	44	3422.22	386.19	5.56	7.79	3.27	1	3	3	1	1	3	12	5
C_IC	3	50	1955.56	367.51	5.42	7.15	2.24	1	2	3	1	1	2	10	4.16667
C_IC	4	29	2933.33	68.56	5.26	6.47	2.73	1	2	1	1	1	2	8	3.33333
C_IC	5	50	244.44	246.06	5.22	6.74	3	1	1	2	1	1	3	9	3.75
C_IC	6	41	1466.67	316.13	5.6	6.21	2.29	1	2	3	1	1	2	10	4.16667
C_IC	7	61	1955.56	213.36	6.52	6.59	3.11	2	2	2	2	1	3	12	5
C_IC	8	41	488.89	171.32	5.59	6.75	2.51	1	1	2	1	1	2	8	3.33333
C_IC	9	41	244.44	199.35	4.75	6.47	2.29	1	1	2	1	1	2	8	3.33333	4.07407	0.683948
C_OM	1	100	3911.11	306.78	6.85	7.59	3.27	4	3	3	2	1	3	16	6.66667
C_OM	2	97	4155.56	372.18	6.75	8.54	3.11	3	3	3	2	1	3	15	6.25
C_OM	3	94	1711.11	348.82	7.24	7.77	3.11	3	2	3	2	1	3	14	5.83333
C_OM	4	97	1222.22	260.07	7.15	13.71	3.22	3	2	2	2	2	3	14	5.83333
C_OM	5	105	2933.33	330.14	7.03	7.16	3.49	4	2	3	2	1	3	15	6.25
C_OM	6	94	2933.33	297.44	6.6	8.05	3.33	3	2	2	2	1	3	13	5.41667
C_OM	7	97	1466.67	460.93	5.76	6.53	3.33	3	2	3	1	1	3	13	5.41667
C_OM	8	97	1711.11	479.61	5.84	8.48	3.44	3	2	3	1	1	3	13	5.41667
C_OM	9	102	1466.67	465.6	6.45	7.87	3.11	4	2	3	2	1	3	15	6.25	5.92593	0.455378
C_INM	1	114	2200	530.99	6.91	8.92	3.27	4	2	4	2	1	3	16	6.66667
C_INM	2	111	2688.89	530.99	7.25	8.8	3.44	4	2	4	2	1	3	16	6.66667
C_INM	3	108	1955.56	502.97	6.87	8.81	3.71	4	2	4	2	1	3	16	6.66667
C_INM	4	91	1955.56	601.06	6.89	9.14	3.38	3	2	4	2	1	3	15	6.25
C_INM	5	85	2444.44	596.39	6.74	10.72	3.27	3	2	4	2	2	3	16	6.66667
C_INM	6	108	2933.33	587.04	6.91	11.89	3.44	4	2	4	2	2	3	17	7.08333
C_INM	7	100	3177.78	479.61	6.87	9.47	3.38	4	3	3	2	1	3	16	6.66667
C_INM	8	79	2688.89	559.02	6.94	10.02	3.27	2	2	4	2	2	3	15	6.25
C_INM	9	97	1711.11	507.64	6.83	10.57	3.44	3	2	4	2	2	3	16	6.66667	6.62037	0.250386
M_Control	1	56	1955.56	689.81	4.41	22.78	3.38	1	2	4	1	3	3	14	5.83333
M_Control	2	67	2933.33	661.78	5.04	22.5	3.27	2	2	4	1	3	3	15	6.25
M_Control	3	64	2688.89	647.77	4.22	20.83	3.22	2	2	4	1	3	3	15	6.25
M_Control	4	61	2933.33	577.7	4.5	19.44	3.93	2	2	4	1	2	3	14	5.83333
M_Control	5	64	3177.78	610.4	5.56	20.2	3.55	2	3	4	1	3	3	16	6.66667
M_Control	6	85	2200	521.65	4.2	18.92	3.76	3	2	4	1	2	3	15	6.25
M_Control	7	76	1466.67	759.87	4.37	20.17	3.38	2	2	4	1	3	3	15	6.25
M_Control	8	67	1711.11	713.16	4.73	19.99	3.27	2	2	4	1	2	3	14	5.83333
M_Control	9	79	977.78	703.82	4.77	18.7	3.27	2	1	4	1	2	3	13	5.41667	6.06481	0.367465
M_IC	1	56	3177.78	717.83	6.05	24.65	3.55	1	3	4	2	3	3	16	6.66667
M_IC	2	73	3177.78	657.11	4.6	25.31	3.98	2	3	4	1	3	3	16	6.66667
M_IC	3	67	3666.67	675.79	4.9	24.85	4.04	2	3	4	1	3	3	16	6.66667
M_IC	4	82	1466.67	745.86	5.9	28.4	3.87	3	2	4	1	3	3	16	6.66667
M_IC	5	85	1711.11	717.83	5.07	18.5	3.76	3	2	4	1	2	3	15	6.25
M_IC	6	79	1222.22	741.19	5.77	22.09	3.66	2	2	4	1	3	3	15	6.25
M_IC	7	82	1955.56	741.19	4.8	25.33	4.04	3	2	4	1	3	3	16	6.66667
M_IC	8	79	2444.44	783.23	5.15	26.25	4.09	2	2	4	1	3	3	15	6.25
M_IC	9	94	1955.56	759.87	5.59	25.96	4.04	3	2	4	1	3	3	16	6.66667	6.52778	0.208333
M_OM	1	102	1955.56	853.29	8.08	27.97	3.49	4	2	4	3	3	3	19	7.91667
M_OM	2	120	1955.56	857.96	5.72	26.45	3.76	4	2	4	1	3	3	17	7.08333
M_OM	3	105	1955.56	843.95	4.34	23.39	3.87	4	2	4	1	3	3	17	7.08333
M_OM	4	97	2200	853.29	4.5	26.86	4.15	3	2	4	1	3	3	16	6.66667
M_OM	5	97	4155.56	843.95	4.89	27.3	4.15	3	3	4	1	3	3	17	7.08333
M_OM	6	100	2688.89	848.62	4.89	21.67	4.2	4	2	4	1	3	3	17	7.08333
M_OM	7	85	2933.33	857.96	5.13	26.68	3.87	3	2	4	1	3	3	16	6.66667
M_OM	8	91	2444.44	867.3	5.23	23.58	3.71	3	2	4	1	3	3	16	6.66667
M_OM	9	82	3177.78	848.62	5.56	22.74	3.6	3	3	4	1	3	3	17	7.08333	7.03704	0.38665
M_INM	1	108	3177.78	857.96	6.07	28.68	4.04	4	3	4	2	3	3	19	7.91667
M_INM	2	108	1955.56	853.29	5.76	26.35	3.71	4	2	4	1	3	3	17	7.08333
M_INM	3	94	2688.89	843.95	5.51	27.26	3.82	3	2	4	1	3	3	16	6.66667
M_INM	4	91	3911.11	848.62	6.05	28.31	4.09	3	3	4	2	3	3	18	7.5
M_INM	5	102	3911.11	848.62	6.1	26.01	4.2	4	3	4	2	3	3	19	7.91667
M_INM	6	100	2688.89	857.96	5.22	26.91	4.2	4	2	4	1	3	3	17	7.08333
M_INM	7	123	2933.33	862.63	5.53	25.91	3.55	4	2	4	1	3	3	17	7.08333
M_INM	8	111	3177.78	867.3	5.69	27.25	3.93	4	3	4	1	3	3	18	7.5
M_INM	9	126	1711.11	871.97	5.55	25.71	3.76	4	2	4	1	3	3	17	7.08333	7.31481	0.422414
K_Control	1	56	488.89	222.71	4.89	1.54	2.29	1	1	2	1	1	2	8	3.33333
K_Control	2	44	977.78	269.42	5.05	2.02	2.46	1	1	2	1	1	2	8	3.33333
K_Control	3	47	977.78	292.77	4.86	2.31	2.56	1	1	2	1	1	2	8	3.33333
K_Control	4	50	733.33	264.74	4.33	2.06	2.35	1	1	2	1	1	2	8	3.33333
K_Control	5	38	733.33	250.73	4.89	2.62	2.56	1	1	2	1	1	2	8	3.33333
K_Control	6	59	977.78	246.06	4.59	3.14	2.35	1	1	2	1	1	2	8	3.33333
K_Control	7	44	977.78	232.05	4.65	2.58	2.35	1	1	2	1	1	2	8	3.33333
K_Control	8	41	488.89	288.1	4.59	2.36	2.51	1	1	2	1	1	2	8	3.33333
K_Control	9	32	2688.89	302.11	4.75	2.29	2.24	1	2	3	1	1	2	10	4.16667	3.42593	0.277778
K_IC	1	56	977.78	283.43	5.55	2.06	3.06	1	1	2	1	1	3	9	3.75
K_IC	2	50	488.89	208.69	5.98	2.52	2.95	1	1	2	1	1	2	8	3.33333
K_IC	3	41	977.78	367.51	4.76	2.58	3.06	1	1	3	1	1	3	10	4.16667
K_IC	4	35	488.89	334.81	4.76	2.15	2.95	1	1	3	1	1	2	9	3.75
K_IC	5	70	2200	283.43	4.18	3.18	2.84	2	2	2	1	1	2	10	4.16667
K_IC	6	38	1466.67	451.58	5.44	3.16	3	1	2	3	1	1	3	11	4.58333
K_IC	7	44	1711.11	278.76	4.64	2.21	2.78	1	2	2	1	1	2	9	3.75
K_IC	8	47	244.44	339.48	4.84	2.48	2.89	1	1	3	1	1	2	9	3.75
K_IC	9	50	1222.22	297.44	4.44	2.48	2.89	1	2	2	1	1	2	9	3.75	3.88889	0.360844
K_OM	1	59	1222.22	297.44	4.71	2.6	3.27	1	2	2	1	1	3	10	4.16667
K_OM	2	64	2444.44	260.07	5.38	2.36	2.78	2	2	2	1	1	2	10	4.16667
K_OM	3	67	2444.44	418.89	4.84	1.9	3.16	2	2	3	1	1	3	12	5
K_OM	4	44	244.44	348.82	4.43	3.06	3.27	1	1	3	1	1	3	10	4.16667
K_OM	5	38	977.78	330.14	4.76	2.19	3.38	1	1	3	1	1	3	10	4.16667
K_OM	6	59	1466.67	390.86	6.05	1.74	3.44	1	2	3	2	1	3	12	5
K_OM	7	56	733.33	334.81	4.96	2.7	2.78	1	1	3	1	1	2	9	3.75
K_OM	8	67	1222.22	353.49	5.69	4.8	3.06	2	2	3	1	1	3	12	5
K_OM	9	76	1955.56	348.82	4.58	3.19	3	2	2	3	1	1	3	12	5	4.49074	0.500771
K_INM	1	88	1466.67	414.22	6.33	2.39	2.95	3	2	3	2	1	2	13	5.41667
K_INM	2	91	3177.78	320.8	6.03	2.35	2.84	3	3	3	2	1	2	14	5.83333
K_INM	3	102	2444.44	414.22	6.06	4.18	3	4	2	3	2	1	3	15	6.25
K_INM	4	94	977.78	409.55	5.34	4.14	3.22	3	1	3	1	1	3	12	5
K_INM	5	70	1955.56	348.82	5.7	4.1	3.27	2	2	3	1	1	3	12	5
K_INM	6	64	977.78	115.27	4.48	4.26	3.33	2	1	2	1	1	3	10	4.16667
K_INM	7	56	2933.33	376.85	5.82	2.39	3.27	1	2	3	1	1	3	11	4.58333
K_INM	8	44	2200	381.52	4.2	2.35	3.06	1	2	3	1	1	3	11	4.58333
K_INM	9	38	1222.22	409.55	4.42	2.36	3.16	1	2	3	1	1	3	11	4.58333	5.0463	0.673289

## Sheet: SBQI2
		Actual values						Soil index scales
Treatments	Replications	SOC	MBC	SLC	SPI	DHA	SIR	SOC	MBC	SLC	SPI	DHA	SIR	Scaled SUM	10-scaled SBQI	SBQI2	SD
C_Control	1	64	1711.11	339.48	5.1	4.63	2.18	2	2	3	1	1	2	9.75	3.54203
C_Control	2	50	488.89	264.74	4.93	6.06	2.02	1	1	2	1	1	2	6.75	2.29192
C_Control	3	56	733.33	232.05	5.34	5.23	1.8	1	1	2	1	1	2	6.75	2.29192
C_Control	4	53	1955.56	171.32	5.38	5.15	2.84	1	2	2	1	1	2	7.75	2.70863
C_Control	5	47	1466.67	255.4	5.27	5.75	2.73	1	2	2	1	1	2	7.75	2.70863
C_Control	6	53	2444.44	157.31	5.68	4.87	2.84	1	2	2	1	1	2	7.75	2.70863
C_Control	7	56	488.89	194.68	5.42	5.04	2.29	1	1	2	1	1	2	6.75	2.29192
C_Control	8	64	244.44	213.36	5.34	5.1	2.46	2	1	2	1	1	2	7.75	2.70863
C_Control	9	47	244.44	222.71	5.55	5.4	2.4	1	1	2	1	1	2	6.75	2.29192	2.61603	0.40496
C_IC	1	76	1466.67	334.81	5.6	7.35	2.67	2	2	3	1	1	2	9.75	3.54203
C_IC	2	44	3422.22	386.19	5.56	7.79	3.27	1	3	3	1	1	3	10.75	3.95872
C_IC	3	50	1955.56	367.51	5.42	7.15	2.24	1	2	3	1	1	2	8.75	3.12533
C_IC	4	29	2933.33	68.56	5.26	6.47	2.73	1	2	1	1	1	2	6.75	2.29192
C_IC	5	50	244.44	246.06	5.22	6.74	3	1	1	2	1	1	3	7.75	2.70863
C_IC	6	41	1466.67	316.13	5.6	6.21	2.29	1	2	3	1	1	2	8.75	3.12533
C_IC	7	61	1955.56	213.36	6.52	6.59	3.11	2	2	2	2	1	3	10.75	3.95872
C_IC	8	41	488.89	171.32	5.59	6.75	2.51	1	1	2	1	1	2	6.75	2.29192
C_IC	9	41	244.44	199.35	4.75	6.47	2.29	1	1	2	1	1	2	6.75	2.29192	3.03273	0.684003
C_OM	1	100	3911.11	306.78	6.85	7.59	3.27	4	3	3	2	1	3	14.75	5.62552
C_OM	2	97	4155.56	372.18	6.75	8.54	3.11	3	3	3	2	1	3	13.75	5.20883
C_OM	3	94	1711.11	348.82	7.24	7.77	3.11	3	2	3	2	1	3	12.75	4.79212
C_OM	4	97	1222.22	260.07	7.15	13.71	3.22	3	2	2	2	2	3	12.75	4.79212
C_OM	5	105	2933.33	330.14	7.03	7.16	3.49	4	2	3	2	1	3	13.75	5.20883
C_OM	6	94	2933.33	297.44	6.6	8.05	3.33	3	2	2	2	1	3	11.75	4.37542
C_OM	7	97	1466.67	460.93	5.76	6.53	3.33	3	2	3	1	1	3	11.75	4.37542
C_OM	8	97	1711.11	479.61	5.84	8.48	3.44	3	2	3	1	1	3	11.75	4.37542
C_OM	9	102	1466.67	465.6	6.45	7.87	3.11	4	2	3	2	1	3	13.75	5.20883	4.88472	0.455414
C_INM	1	114	2200	530.99	6.91	8.92	3.27	4	2	4	2	1	3	14.75	5.62552
C_INM	2	111	2688.89	530.99	7.25	8.8	3.44	4	2	4	2	1	3	14.75	5.62552
C_INM	3	108	1955.56	502.97	6.87	8.81	3.71	4	2	4	2	1	3	14.75	5.62552
C_INM	4	91	1955.56	601.06	6.89	9.14	3.38	3	2	4	2	1	3	13.75	5.20883
C_INM	5	85	2444.44	596.39	6.74	10.72	3.27	3	2	4	2	2	3	14.75	5.62552
C_INM	6	108	2933.33	587.04	6.91	11.89	3.44	4	2	4	2	2	3	15.75	6.04223
C_INM	7	100	3177.78	479.61	6.87	9.47	3.38	4	3	3	2	1	3	14.75	5.62552
C_INM	8	79	2688.89	559.02	6.94	10.02	3.27	2	2	4	2	2	3	13.75	5.20883
C_INM	9	97	1711.11	507.64	6.83	10.57	3.44	3	2	4	2	2	3	14.75	5.62552	5.57923	0.250406
M_Control	1	56	1955.56	689.81	4.41	22.78	3.38	1	2	4	1	3	3	12.75	4.79212
M_Control	2	67	2933.33	661.78	5.04	22.5	3.27	2	2	4	1	3	3	13.75	5.20883
M_Control	3	64	2688.89	647.77	4.22	20.83	3.22	2	2	4	1	3	3	13.75	5.20883
M_Control	4	61	2933.33	577.7	4.5	19.44	3.93	2	2	4	1	2	3	12.75	4.79212
M_Control	5	64	3177.78	610.4	5.56	20.2	3.55	2	3	4	1	3	3	14.75	5.62552
M_Control	6	85	2200	521.65	4.2	18.92	3.76	3	2	4	1	2	3	13.75	5.20883
M_Control	7	76	1466.67	759.87	4.37	20.17	3.38	2	2	4	1	3	3	13.75	5.20883
M_Control	8	67	1711.11	713.16	4.73	19.99	3.27	2	2	4	1	2	3	12.75	4.79212
M_Control	9	79	977.78	703.82	4.77	18.7	3.27	2	1	4	1	2	3	11.75	4.37542	5.02362	0.367495
M_IC	1	56	3177.78	717.83	6.05	24.65	3.55	1	3	4	2	3	3	14.75	5.62552
M_IC	2	73	3177.78	657.11	4.6	25.31	3.98	2	3	4	1	3	3	14.75	5.62552
M_IC	3	67	3666.67	675.79	4.9	24.85	4.04	2	3	4	1	3	3	14.75	5.62552
M_IC	4	82	1466.67	745.86	5.9	28.4	3.87	3	2	4	1	3	3	14.75	5.62552
M_IC	5	85	1711.11	717.83	5.07	18.5	3.76	3	2	4	1	2	3	13.75	5.20883
M_IC	6	79	1222.22	741.19	5.77	22.09	3.66	2	2	4	1	3	3	13.75	5.20883
M_IC	7	82	1955.56	741.19	4.8	25.33	4.04	3	2	4	1	3	3	14.75	5.62552
M_IC	8	79	2444.44	783.23	5.15	26.25	4.09	2	2	4	1	3	3	13.75	5.20883
M_IC	9	94	1955.56	759.87	5.59	25.96	4.04	3	2	4	1	3	3	14.75	5.62552	5.48663	0.20835
M_OM	1	102	1955.56	853.29	8.08	27.97	3.49	4	2	4	3	3	3	17.75	6.87563
M_OM	2	120	1955.56	857.96	5.72	26.45	3.76	4	2	4	1	3	3	15.75	6.04223
M_OM	3	105	1955.56	843.95	4.34	23.39	3.87	4	2	4	1	3	3	15.75	6.04223
M_OM	4	97	2200	853.29	4.5	26.86	4.15	3	2	4	1	3	3	14.75	5.62552
M_OM	5	97	4155.56	843.95	4.89	27.3	4.15	3	3	4	1	3	3	15.75	6.04223
M_OM	6	100	2688.89	848.62	4.89	21.67	4.2	4	2	4	1	3	3	15.75	6.04223
M_OM	7	85	2933.33	857.96	5.13	26.68	3.87	3	2	4	1	3	3	14.75	5.62552
M_OM	8	91	2444.44	867.3	5.23	23.58	3.71	3	2	4	1	3	3	14.75	5.62552
M_OM	9	82	3177.78	848.62	5.56	22.74	3.6	3	3	4	1	3	3	15.75	6.04223	5.99592	0.386681
M_INM	1	108	3177.78	857.96	6.07	28.68	4.04	4	3	4	2	3	3	17.75	6.87563
M_INM	2	108	1955.56	853.29	5.76	26.35	3.71	4	2	4	1	3	3	15.75	6.04223
M_INM	3	94	2688.89	843.95	5.51	27.26	3.82	3	2	4	1	3	3	14.75	5.62552
M_INM	4	91	3911.11	848.62	6.05	28.31	4.09	3	3	4	2	3	3	16.75	6.45892
M_INM	5	102	3911.11	848.62	6.1	26.01	4.2	4	3	4	2	3	3	17.75	6.87563
M_INM	6	100	2688.89	857.96	5.22	26.91	4.2	4	2	4	1	3	3	15.75	6.04223
M_INM	7	123	2933.33	862.63	5.53	25.91	3.55	4	2	4	1	3	3	15.75	6.04223
M_INM	8	111	3177.78	867.3	5.69	27.25	3.93	4	3	4	1	3	3	16.75	6.45892
M_INM	9	126	1711.11	871.97	5.55	25.71	3.76	4	2	4	1	3	3	15.75	6.04223	6.27373	0.422448
K_Control	1	56	488.89	222.71	4.89	1.54	2.29	1	1	2	1	1	2	6.75	2.29192
K_Control	2	44	977.78	269.42	5.05	2.02	2.46	1	1	2	1	1	2	6.75	2.29192
K_Control	3	47	977.78	292.77	4.86	2.31	2.56	1	1	2	1	1	2	6.75	2.29192
K_Control	4	50	733.33	264.74	4.33	2.06	2.35	1	1	2	1	1	2	6.75	2.29192
K_Control	5	38	733.33	250.73	4.89	2.62	2.56	1	1	2	1	1	2	6.75	2.29192
K_Control	6	59	977.78	246.06	4.59	3.14	2.35	1	1	2	1	1	2	6.75	2.29192
K_Control	7	44	977.78	232.05	4.65	2.58	2.35	1	1	2	1	1	2	6.75	2.29192
K_Control	8	41	488.89	288.1	4.59	2.36	2.51	1	1	2	1	1	2	6.75	2.29192
K_Control	9	32	2688.89	302.11	4.75	2.29	2.24	1	2	3	1	1	2	8.75	3.12533	2.38452	0.2778
K_IC	1	56	977.78	283.43	5.55	2.06	3.06	1	1	2	1	1	3	7.75	2.70863
K_IC	2	50	488.89	208.69	5.98	2.52	2.95	1	1	2	1	1	2	6.75	2.29192
K_IC	3	41	977.78	367.51	4.76	2.58	3.06	1	1	3	1	1	3	8.75	3.12533
K_IC	4	35	488.89	334.81	4.76	2.15	2.95	1	1	3	1	1	2	7.75	2.70863
K_IC	5	70	2200	283.43	4.18	3.18	2.84	2	2	2	1	1	2	8.75	3.12533
K_IC	6	38	1466.67	451.58	5.44	3.16	3	1	2	3	1	1	3	9.75	3.54203
K_IC	7	44	1711.11	278.76	4.64	2.21	2.78	1	2	2	1	1	2	7.75	2.70863
K_IC	8	47	244.44	339.48	4.84	2.48	2.89	1	1	3	1	1	2	7.75	2.70863
K_IC	9	50	1222.22	297.44	4.44	2.48	2.89	1	2	2	1	1	2	7.75	2.70863	2.84753	0.360873
K_OM	1	59	1222.22	297.44	4.71	2.6	3.27	1	2	2	1	1	3	8.75	3.12533
K_OM	2	64	2444.44	260.07	5.38	2.36	2.78	2	2	2	1	1	2	8.75	3.12533
K_OM	3	67	2444.44	418.89	4.84	1.9	3.16	2	2	3	1	1	3	10.75	3.95872
K_OM	4	44	244.44	348.82	4.43	3.06	3.27	1	1	3	1	1	3	8.75	3.12533
K_OM	5	38	977.78	330.14	4.76	2.19	3.38	1	1	3	1	1	3	8.75	3.12533
K_OM	6	59	1466.67	390.86	6.05	1.74	3.44	1	2	3	2	1	3	10.75	3.95872
K_OM	7	56	733.33	334.81	4.96	2.7	2.78	1	1	3	1	1	2	7.75	2.70863
K_OM	8	67	1222.22	353.49	5.69	4.8	3.06	2	2	3	1	1	3	10.75	3.95872
K_OM	9	76	1955.56	348.82	4.58	3.19	3	2	2	3	1	1	3	10.75	3.95872	3.44943	0.500811
K_INM	1	88	1466.67	414.22	6.33	2.39	2.95	3	2	3	2	1	2	11.75	4.37542
K_INM	2	91	3177.78	320.8	6.03	2.35	2.84	3	3	3	2	1	2	12.75	4.79212
K_INM	3	102	2444.44	414.22	6.06	4.18	3	4	2	3	2	1	3	13.75	5.20883
K_INM	4	94	977.78	409.55	5.34	4.14	3.22	3	1	3	1	1	3	10.75	3.95872
K_INM	5	70	1955.56	348.82	5.7	4.1	3.27	2	2	3	1	1	3	10.75	3.95872
K_INM	6	64	977.78	115.27	4.48	4.26	3.33	2	1	2	1	1	3	8.75	3.12533
K_INM	7	56	2933.33	376.85	5.82	2.39	3.27	1	2	3	1	1	3	9.75	3.54203
K_INM	8	44	2200	381.52	4.2	2.35	3.06	1	2	3	1	1	3	9.75	3.54203
K_INM	9	38	1222.22	409.55	4.42	2.36	3.16	1	2	3	1	1	3	9.75	3.54203	4.00502	0.673343

## Sheet: SBQI3
		Actual values						Rank						Percentile score							Actural
		SOC	MBC	SLC	SPI	DHA	SIR	RSOC	RMBC	RSLC	RSPI	RDHA	RSIR	PSOC	PMBC	PSLC	PSPI	PDHA	PSIR	SUM	SBQI3	SBQI3	SD
Treatments	Rep	64	1711.11	339.48	5.1	4.63	2.18	46.5	47.5	41.5	43	36	3	42.5926	43.5185	37.963	39.3519	32.8704	2.31481	198.611	3.31019
C_Control	1	50	488.89	264.74	4.93	6.06	2.02	25.5	10	21.5	38	45	2	23.1481	8.7963	19.4444	34.7222	41.2037	1.38889	128.704	2.14506
C_Control	2	56	733.33	232.05	5.34	5.23	1.8	34.5	15.5	13.5	52	42	1	31.4815	13.8889	12.037	47.6852	38.4259	0.462963	143.981	2.39969
C_Control	3	53	1955.56	171.32	5.38	5.15	2.84	29.5	58.5	4.5	54.5	41	27.5	26.8519	53.7037	3.7037	50	37.5	25	196.759	3.27932
C_Control	4	47	1466.67	255.4	5.27	5.75	2.73	20.5	38.5	18	50	44	21.5	18.5185	35.1852	16.2037	45.8333	40.2778	19.4444	175.463	2.92438
C_Control	5	53	2444.44	157.31	5.68	4.87	2.84	29.5	74	3	71	38	27.5	26.8519	68.0556	2.31481	65.2778	34.7222	25	222.222	3.7037
C_Control	6	56	488.89	194.68	5.42	5.04	2.29	34.5	10	6	56.5	39	7.5	31.4815	8.7963	5.09259	51.8519	35.6481	6.48148	139.352	2.32253
C_Control	7	64	244.44	213.36	5.34	5.1	2.46	46.5	3.5	9.5	52	40	14.5	42.5926	2.77778	8.33333	47.6852	36.5741	12.963	150.926	2.51543
C_Control	8	47	244.44	222.71	5.55	5.4	2.4	20.5	3.5	11.5	62	43	13	18.5185	2.77778	10.1852	56.9444	39.3519	11.5741	139.352	2.32253	2.7692	0.552243
C_Control	9	76	1466.67	334.81	5.6	7.35	2.67	59	38.5	39	69.5	55	20	54.1667	35.1852	35.6481	63.8889	50.463	18.0556	257.407	4.29012
C_IC	1	44	3422.22	386.19	5.56	7.79	3.27	15.5	102	53	65	58	57.5	13.8889	93.9815	48.6111	59.7222	53.2407	52.7778	322.222	5.37037
C_IC	2	50	1955.56	367.51	5.42	7.15	2.24	25.5	58.5	48.5	56.5	53	4.5	23.1481	53.7037	44.4444	51.8519	48.6111	3.7037	225.463	3.75772
C_IC	3	29	2933.33	68.56	5.26	6.47	2.73	1	89	1	49	47.5	21.5	0.462963	81.9444	0.462963	44.9074	43.5185	19.4444	190.741	3.17901
C_IC	4	50	244.44	246.06	5.22	6.74	3	25.5	3.5	15.5	46.5	51	36.5	23.1481	2.77778	13.8889	42.5926	46.7593	33.3333	162.5	2.70833
C_IC	5	41	1466.67	316.13	5.6	6.21	2.29	10	38.5	34	69.5	46	7.5	8.7963	35.1852	31.0185	63.8889	42.1296	6.48148	187.5	3.125
C_IC	6	61	1955.56	213.36	6.52	6.59	3.11	42.5	58.5	9.5	92	50	44.5	38.8889	53.7037	8.33333	84.7222	45.8333	40.7407	272.222	4.53704
C_IC	7	41	488.89	171.32	5.59	6.75	2.51	10	10	4.5	67.5	52	16.5	8.7963	8.7963	3.7037	62.037	47.6852	14.8148	145.833	2.43056
C_IC	8	41	244.44	199.35	4.75	6.47	2.29	10	3.5	7	23.5	47.5	7.5	8.7963	2.77778	6.01852	21.2963	43.5185	6.48148	88.8889	1.48148	3.43107	1.18902
C_IC	9	100	3911.11	306.78	6.85	7.59	3.27	90.5	105	33	97	56	57.5	83.3333	96.7593	30.0926	89.3519	51.3889	52.7778	403.704	6.7284
C_OM	1	97	4155.56	372.18	6.75	8.54	3.11	85	107.5	50	95	62	44.5	78.2407	99.0741	45.8333	87.5	56.9444	40.7407	408.333	6.80556
C_OM	2	94	1711.11	348.82	7.24	7.77	3.11	79	47.5	44.5	106	57	44.5	72.6852	43.5185	40.7407	97.6852	52.3148	40.7407	347.685	5.79475
C_OM	3	97	1222.22	260.07	7.15	13.71	3.22	85	30.5	19.5	105	72	50	78.2407	27.7778	17.5926	96.7593	66.2037	45.8333	332.407	5.54012
C_OM	4	105	2933.33	330.14	7.03	7.16	3.49	97.5	89	36.5	104	54	77.5	89.8148	81.9444	33.3333	95.8333	49.537	71.2963	421.759	7.02932
C_OM	5	94	2933.33	297.44	6.6	8.05	3.33	79	89	30	93	60	65	72.6852	81.9444	27.3148	85.6481	55.0926	59.7222	382.407	6.37346
C_OM	6	97	1466.67	460.93	5.76	6.53	3.33	85	38.5	61	76.5	49	65	78.2407	35.1852	56.0185	70.3704	44.9074	59.7222	344.444	5.74074
C_OM	7	97	1711.11	479.61	5.84	8.48	3.44	85	47.5	63.5	80	61	74	78.2407	43.5185	58.3333	73.6111	56.0185	68.0556	377.778	6.2963
C_OM	8	102	1466.67	465.6	6.45	7.87	3.11	94.5	38.5	62	91	59	44.5	87.037	35.1852	56.9444	83.7963	54.1667	40.7407	357.87	5.96451	6.25257	0.526094
C_OM	9	114	2200	530.99	6.91	8.92	3.27	105	68	68.5	101.5	65	57.5	96.7593	62.5	62.963	93.5185	59.7222	52.7778	428.241	7.13735
C_INM	1	111	2688.89	530.99	7.25	8.8	3.44	103.5	81	68.5	107	63	74	95.3704	74.537	62.963	98.6111	57.8704	68.0556	457.407	7.62346
C_INM	2	108	1955.56	502.97	6.87	8.81	3.71	100.5	58.5	65	98.5	64	85	92.5926	53.7037	59.7222	90.7407	58.7963	78.2407	433.796	7.22994
C_INM	3	91	1955.56	601.06	6.89	9.14	3.38	74.5	58.5	74	100	66	69	68.5185	53.7037	68.0556	92.1296	60.6481	63.4259	406.481	6.77469
C_INM	4	85	2444.44	596.39	6.74	10.72	3.27	69.5	74	73	94	70	57.5	63.8889	68.0556	67.1296	86.5741	64.3519	52.7778	402.778	6.71296
C_INM	5	108	2933.33	587.04	6.91	11.89	3.44	100.5	89	72	101.5	71	74	92.5926	81.9444	66.2037	93.5185	65.2778	68.0556	467.593	7.79321
C_INM	6	100	3177.78	479.61	6.87	9.47	3.38	90.5	97.5	63.5	98.5	67	69	83.3333	89.8148	58.3333	90.7407	61.5741	63.4259	447.222	7.4537
C_INM	7	79	2688.89	559.02	6.94	10.02	3.27	62.5	81	70	103	68	57.5	57.4074	74.537	64.3519	94.9074	62.5	52.7778	406.481	6.77469
C_INM	8	97	1711.11	507.64	6.83	10.57	3.44	85	47.5	66	96	69	74	78.2407	43.5185	60.6481	88.4259	63.4259	68.0556	402.315	6.70525	7.13392	0.419055
C_INM	9	56	1955.56	689.81	4.41	22.78	3.38	34.5	58.5	80	8	85	69	31.4815	53.7037	73.6111	6.94444	78.2407	63.4259	307.407	5.12346
M_Control	1	67	2933.33	661.78	5.04	22.5	3.27	52	89	78	40	83	57.5	47.6852	81.9444	71.7593	36.5741	76.3889	52.7778	367.13	6.11883
M_Control	2	64	2688.89	647.77	4.22	20.83	3.22	46.5	81	76	4	80	50	42.5926	74.537	69.9074	3.24074	73.6111	45.8333	309.722	5.16204
M_Control	3	61	2933.33	577.7	4.5	19.44	3.93	42.5	89	71	13.5	76	95.5	38.8889	81.9444	65.2778	12.037	69.9074	87.963	356.019	5.93364
M_Control	4	64	3177.78	610.4	5.56	20.2	3.55	46.5	97.5	75	65	79	80	42.5926	89.8148	68.9815	59.7222	72.6852	73.6111	407.407	6.79012
M_Control	5	85	2200	521.65	4.2	18.92	3.76	69.5	68	67	2.5	75	88.5	63.8889	62.5	61.5741	1.85185	68.9815	81.4815	340.278	5.6713
M_Control	6	76	1466.67	759.87	4.37	20.17	3.38	59	38.5	88.5	7	78	69	54.1667	35.1852	81.4815	6.01852	71.7593	63.4259	312.037	5.20062
M_Control	7	67	1711.11	713.16	4.73	19.99	3.27	52	47.5	82	22	77	57.5	47.6852	43.5185	75.463	19.9074	70.8333	52.7778	310.185	5.16975
M_Control	8	79	977.78	703.82	4.77	18.7	3.27	62.5	22.5	81	28	74	57.5	57.4074	20.3704	74.537	25.463	68.0556	52.7778	298.611	4.97685	5.57184	0.606906
M_Control	9	56	3177.78	717.83	6.05	24.65	3.55	34.5	97.5	83.5	85	88	80	31.4815	89.8148	76.8519	78.2407	81.0185	73.6111	431.019	7.18364
M_IC	1	73	3177.78	657.11	4.6	25.31	3.98	57	97.5	77	18	90	97	52.3148	89.8148	70.8333	16.2037	82.8704	89.3519	401.389	6.68981
M_IC	2	67	3666.67	675.79	4.9	24.85	4.04	52	103	79	37	89	99.5	47.6852	94.9074	72.6852	33.7963	81.9444	91.6667	422.685	7.04475
M_IC	3	82	1466.67	745.86	5.9	28.4	3.87	66	38.5	87	81	107	93	60.6481	35.1852	80.0926	74.537	98.6111	85.6481	434.722	7.24537
M_IC	4	85	1711.11	717.83	5.07	18.5	3.76	69.5	47.5	83.5	42	73	88.5	63.8889	43.5185	76.8519	38.4259	67.1296	81.4815	371.296	6.18827
M_IC	5	79	1222.22	741.19	5.77	22.09	3.66	62.5	30.5	85.5	78	82	83	57.4074	27.7778	78.7037	71.7593	75.463	76.3889	387.5	6.45833
M_IC	6	82	1955.56	741.19	4.8	25.33	4.04	66	58.5	85.5	29	91	99.5	60.6481	53.7037	78.7037	26.3889	83.7963	91.6667	394.907	6.58179
M_IC	7	79	2444.44	783.23	5.15	26.25	4.09	62.5	74	90	45	96	102.5	57.4074	68.0556	82.8704	41.2037	88.4259	94.4444	432.407	7.20679
M_IC	8	94	1955.56	759.87	5.59	25.96	4.04	79	58.5	88.5	67.5	94	99.5	72.6852	53.7037	81.4815	62.037	86.5741	91.6667	448.148	7.46914	6.89643	0.430939
M_IC	9	102	1955.56	853.29	8.08	27.97	3.49	94.5	58.5	99	108	105	77.5	87.037	53.7037	91.2037	99.537	96.7593	71.2963	499.537	8.32562
M_OM	1	120	1955.56	857.96	5.72	26.45	3.76	106	58.5	102.5	75	98	88.5	97.6852	53.7037	94.4444	68.9815	90.2778	81.4815	486.574	8.10957
M_OM	2	105	1955.56	843.95	4.34	23.39	3.87	97.5	58.5	92	6	86	93	89.8148	53.7037	84.7222	5.09259	79.1667	85.6481	398.148	6.6358
M_OM	3	97	2200	853.29	4.5	26.86	4.15	85	68	99	13.5	100	104.5	78.2407	62.5	91.2037	12.037	92.1296	96.2963	432.407	7.20679
M_OM	4	97	4155.56	843.95	4.89	27.3	4.15	85	107.5	92	34.5	104	104.5	78.2407	99.0741	84.7222	31.4815	95.8333	96.2963	485.648	8.09414
M_OM	5	100	2688.89	848.62	4.89	21.67	4.2	90.5	81	95.5	34.5	81	107	83.3333	74.537	87.963	31.4815	74.537	98.6111	450.463	7.50772
M_OM	6	85	2933.33	857.96	5.13	26.68	3.87	69.5	89	102.5	44	99	93	63.8889	81.9444	94.4444	40.2778	91.2037	85.6481	457.407	7.62346
M_OM	7	91	2444.44	867.3	5.23	23.58	3.71	74.5	74	106.5	48	87	85	68.5185	68.0556	98.1481	43.9815	80.0926	78.2407	437.037	7.28395
M_OM	8	82	3177.78	848.62	5.56	22.74	3.6	66	97.5	95.5	65	84	82	60.6481	89.8148	87.963	59.7222	77.3148	75.463	450.926	7.51543	7.58916	0.527931
M_OM	9	108	3177.78	857.96	6.07	28.68	4.04	100.5	97.5	102.5	88	108	99.5	92.5926	89.8148	94.4444	81.0185	99.537	91.6667	549.074	9.15123
M_INM	1	108	1955.56	853.29	5.76	26.35	3.71	100.5	58.5	99	76.5	97	85	92.5926	53.7037	91.2037	70.3704	89.3519	78.2407	475.463	7.92438
M_INM	2	94	2688.89	843.95	5.51	27.26	3.82	79	81	92	59	103	91	72.6852	74.537	84.7222	54.1667	94.9074	83.7963	464.815	7.74691
M_INM	3	91	3911.11	848.62	6.05	28.31	4.09	74.5	105	95.5	85	106	102.5	68.5185	96.7593	87.963	78.2407	97.6852	94.4444	523.611	8.72685
M_INM	4	102	3911.11	848.62	6.1	26.01	4.2	94.5	105	95.5	89	95	107	87.037	96.7593	87.963	81.9444	87.5	98.6111	539.815	8.99691
M_INM	5	100	2688.89	857.96	5.22	26.91	4.2	90.5	81	102.5	46.5	101	107	83.3333	74.537	94.4444	42.5926	93.0556	98.6111	486.574	8.10957
M_INM	6	123	2933.33	862.63	5.53	25.91	3.55	107	89	105	60	93	80	98.6111	81.9444	96.7593	55.0926	85.6481	73.6111	491.667	8.19444
M_INM	7	111	3177.78	867.3	5.69	27.25	3.93	103.5	97.5	106.5	72.5	102	95.5	95.3704	89.8148	98.1481	66.6667	93.9815	87.963	531.944	8.86574
M_INM	8	126	1711.11	871.97	5.55	25.71	3.76	108	47.5	108	62	92	88.5	99.537	43.5185	99.537	56.9444	84.7222	81.4815	465.741	7.76235	8.38649	0.550988
M_INM	9	56	488.89	222.71	4.89	1.54	2.29	34.5	10	11.5	34.5	1	7.5	31.4815	8.7963	10.1852	31.4815	0.462963	6.48148	88.8889	1.48148
K_Control	1	44	977.78	269.42	5.05	2.02	2.46	15.5	22.5	23	41	4	14.5	13.8889	20.3704	20.8333	37.5	3.24074	12.963	108.796	1.81327
K_Control	2	47	977.78	292.77	4.86	2.31	2.56	20.5	22.5	28	32	11	18.5	18.5185	20.3704	25.463	29.1667	9.72222	16.6667	119.907	1.99846
K_Control	3	50	733.33	264.74	4.33	2.06	2.35	25.5	15.5	21.5	5	5.5	11	23.1481	13.8889	19.4444	4.16667	4.62963	9.72222	75	1.25
K_Control	4	38	733.33	250.73	4.89	2.62	2.56	5.5	15.5	17	34.5	25	18.5	4.62963	13.8889	15.2778	31.4815	22.6852	16.6667	104.63	1.74383
K_Control	5	59	977.78	246.06	4.59	3.14	2.35	40	22.5	15.5	16.5	28	11	36.5741	20.3704	13.8889	14.8148	25.463	9.72222	120.833	2.01389
K_Control	6	44	977.78	232.05	4.65	2.58	2.35	15.5	22.5	13.5	20	22.5	11	13.8889	20.3704	12.037	18.0556	20.3704	9.72222	94.4444	1.57407
K_Control	7	41	488.89	288.1	4.59	2.36	2.51	10	10	27	16.5	15	16.5	8.7963	8.7963	24.537	14.8148	13.4259	14.8148	85.1852	1.41975
K_Control	8	32	2688.89	302.11	4.75	2.29	2.24	2	81	32	23.5	10	4.5	1.38889	74.537	29.1667	21.2963	8.7963	3.7037	138.889	2.31481	1.7344	0.338073
K_Control	9	56	977.78	283.43	5.55	2.06	3.06	34.5	22.5	25.5	62	5.5	40.5	31.4815	20.3704	23.1481	56.9444	4.62963	37.037	173.611	2.89352
K_IC	1	50	488.89	208.69	5.98	2.52	2.95	25.5	10	8	82	21	33	23.1481	8.7963	6.94444	75.463	18.9815	30.0926	163.426	2.72377
K_IC	2	41	977.78	367.51	4.76	2.58	3.06	10	22.5	48.5	26	22.5	40.5	8.7963	20.3704	44.4444	23.6111	20.3704	37.037	154.63	2.57716
K_IC	3	35	488.89	334.81	4.76	2.15	2.95	3	10	39	26	7	33	2.31481	8.7963	35.6481	23.6111	6.01852	30.0926	106.481	1.77469
K_IC	4	70	2200	283.43	4.18	3.18	2.84	55.5	68	25.5	1	30	27.5	50.9259	62.5	23.1481	0.462963	27.3148	25	189.352	3.15586
K_IC	5	38	1466.67	451.58	5.44	3.16	3	5.5	38.5	60	58	29	36.5	4.62963	35.1852	55.0926	53.2407	26.3889	33.3333	207.87	3.46451
K_IC	6	44	1711.11	278.76	4.64	2.21	2.78	15.5	47.5	24	19	9	24	13.8889	43.5185	21.7593	17.1296	7.87037	21.7593	125.926	2.09877
K_IC	7	47	244.44	339.48	4.84	2.48	2.89	20.5	3.5	41.5	30.5	19.5	30.5	18.5185	2.77778	37.963	27.7778	17.5926	27.7778	132.407	2.20679
K_IC	8	50	1222.22	297.44	4.44	2.48	2.89	25.5	30.5	30	11	19.5	30.5	23.1481	27.7778	27.3148	9.72222	17.5926	27.7778	133.333	2.22222	2.56859	0.54534
K_IC	9	59	1222.22	297.44	4.71	2.6	3.27	40	30.5	30	21	24	57.5	36.5741	27.7778	27.3148	18.9815	21.7593	52.7778	185.185	3.08642
K_OM	1	64	2444.44	260.07	5.38	2.36	2.78	46.5	74	19.5	54.5	15	24	42.5926	68.0556	17.5926	50	13.4259	21.7593	213.426	3.5571
K_OM	2	67	2444.44	418.89	4.84	1.9	3.16	52	74	59	30.5	3	47.5	47.6852	68.0556	54.1667	27.7778	2.31481	43.5185	243.519	4.05864
K_OM	3	44	244.44	348.82	4.43	3.06	3.27	15.5	3.5	44.5	10	27	57.5	13.8889	2.77778	40.7407	8.7963	24.537	52.7778	143.519	2.39198
K_OM	4	38	977.78	330.14	4.76	2.19	3.38	5.5	22.5	36.5	26	8	69	4.62963	20.3704	33.3333	23.6111	6.94444	63.4259	152.315	2.53858
K_OM	5	59	1466.67	390.86	6.05	1.74	3.44	40	38.5	54	85	2	74	36.5741	35.1852	49.537	78.2407	1.38889	68.0556	268.981	4.48302
K_OM	6	56	733.33	334.81	4.96	2.7	2.78	34.5	15.5	39	39	26	24	31.4815	13.8889	35.6481	35.6481	23.6111	21.7593	162.037	2.70062
K_OM	7	67	1222.22	353.49	5.69	4.8	3.06	52	30.5	47	72.5	37	40.5	47.6852	27.7778	43.0556	66.6667	33.7963	37.037	256.019	4.26698
K_OM	8	76	1955.56	348.82	4.58	3.19	3	59	58.5	44.5	15	31	36.5	54.1667	53.7037	40.7407	13.4259	28.2407	33.3333	223.611	3.72685	3.42335	0.777064
K_OM	9	88	1466.67	414.22	6.33	2.39	2.95	72	38.5	57.5	90	17.5	33	66.2037	35.1852	52.7778	82.8704	15.7407	30.0926	282.87	4.71451
K_INM	1	91	3177.78	320.8	6.03	2.35	2.84	74.5	97.5	35	83	12.5	27.5	68.5185	89.8148	31.9444	76.3889	11.1111	25	302.778	5.0463
K_INM	2	102	2444.44	414.22	6.06	4.18	3	94.5	74	57.5	87	34	36.5	87.037	68.0556	52.7778	80.0926	31.0185	33.3333	352.315	5.87191
K_INM	3	94	977.78	409.55	5.34	4.14	3.22	79	22.5	55.5	52	33	50	72.6852	20.3704	50.9259	47.6852	30.0926	45.8333	267.593	4.45988
K_INM	4	70	1955.56	348.82	5.7	4.1	3.27	55.5	58.5	44.5	74	32	57.5	50.9259	53.7037	40.7407	68.0556	29.1667	52.7778	295.37	4.92284
K_INM	5	64	977.78	115.27	4.48	4.26	3.33	46.5	22.5	2	12	35	65	42.5926	20.3704	1.38889	10.6481	31.9444	59.7222	166.667	2.77778
K_INM	6	56	2933.33	376.85	5.82	2.39	3.27	34.5	89	51	79	17.5	57.5	31.4815	81.9444	46.7593	72.6852	15.7407	52.7778	301.389	5.02315
K_INM	7	44	2200	381.52	4.2	2.35	3.06	15.5	68	52	2.5	12.5	40.5	13.8889	62.5	47.6852	1.85185	11.1111	37.037	174.074	2.90123
K_INM	8	38	1222.22	409.55	4.42	2.36	3.16	4.62963	27.7778	50.9259	7.87037	13.4259	43.5185	148.148	2.46914	48.2682	30.2265
K_INM	9	5.5	30.5	55.5	9	15	47.5

## Sheet: SBQI4
		Actual values						PCA normalized values
Treatments	Replications	SOC	MBC	SLC	SPI	DHA	SIR	SOC	MBC	SLC	SPI	DHA	SIR	SUM/variance percent	SBQI4	SBQI4	SD
C_Control	1	64	1711.11	339.48	5.1	4.63	2.18	9.37453	282.521	51.2812	0.706738	0.627657	0.796732	3.60899	3.60899
C_Control	2	50	488.89	264.74	4.93	6.06	2.02	7.32385	80.7206	39.9911	0.68318	0.821512	0.770174	1.36194	1.36194
C_Control	3	56	733.33	232.05	5.34	5.23	1.8	8.20271	121.08	35.053	0.739996	0.708994	0.834225	1.74142	1.74142
C_Control	4	53	1955.56	171.32	5.38	5.15	2.84	7.76328	322.883	25.8793	0.745539	0.698149	0.840474	3.7501	3.7501
C_Control	5	47	1466.67	255.4	5.27	5.75	2.73	6.88442	242.162	38.5802	0.730296	0.779487	0.82329	3.03051	3.03051
C_Control	6	53	2444.44	157.31	5.68	4.87	2.84	7.76328	403.601	23.7629	0.787112	0.660192	0.887341	4.57214	4.57214
C_Control	7	56	488.89	194.68	5.42	5.04	2.29	8.20271	80.7206	29.408	0.751082	0.683238	0.846723	1.26058	1.26058
C_Control	8	64	244.44	213.36	5.34	5.1	2.46	9.37453	40.3595	32.2297	0.739996	0.691371	0.834225	0.880323	0.880323
C_Control	9	47	244.44	222.71	5.55	5.4	2.4	6.88442	40.3595	33.6421	0.769097	0.73204	0.867032	0.870132	0.870132	2.34179	1.40664
C_IC	1	76	1466.67	334.81	5.6	7.35	2.67	11.1323	242.162	50.5757	0.776026	0.996388	0.874843	3.20357	3.20357
C_IC	2	44	3422.22	386.19	5.56	7.79	3.27	6.44499	565.043	58.3371	0.770483	1.05604	0.868594	6.61079	6.61079
C_IC	3	50	1955.56	367.51	5.42	7.15	2.24	7.32385	322.883	55.5153	0.751082	0.969275	0.846723	4.0582	4.0582
C_IC	4	29	2933.33	68.56	5.26	6.47	2.73	4.24783	484.322	10.3565	0.72891	0.877093	0.821728	5.23991	5.23991
C_IC	5	50	244.44	246.06	5.22	6.74	3	7.32385	40.3595	37.1693	0.723367	0.913695	0.815479	0.912471	0.912471
C_IC	6	41	1466.67	316.13	5.6	6.21	2.29	6.00556	242.162	47.754	0.776026	0.841846	0.874843	3.11888	3.11888
C_IC	7	61	1955.56	213.36	6.52	6.59	3.11	8.9351	322.883	32.2297	0.903516	0.89336	1.01857	3.83427	3.83427
C_IC	8	41	488.89	171.32	5.59	6.75	2.51	6.00556	80.7206	25.8793	0.77464	0.91505	0.873281	1.20368	1.20368
C_IC	9	41	244.44	199.35	4.75	6.47	2.29	6.00556	40.3595	30.1134	0.658236	0.877093	0.742054	0.823117	0.823117	3.22276	1.99384
C_OM	1	100	3911.11	306.78	6.85	7.59	3.27	14.6477	645.763	46.3416	0.949246	1.02892	1.07012	7.41849	7.41849
C_OM	2	97	4155.56	372.18	6.75	8.54	3.11	14.2083	686.125	56.2208	0.935388	1.15771	1.0545	7.94002	7.94002
C_OM	3	94	1711.11	348.82	7.24	7.77	3.11	13.7688	282.521	52.6921	1.00329	1.05332	1.13105	3.68071	3.68071
C_OM	4	97	1222.22	260.07	7.15	13.71	3.22	14.2083	201.801	39.2857	0.990818	1.85857	1.11699	2.70967	2.70967
C_OM	5	105	2933.33	330.14	7.03	7.16	3.49	15.3801	484.322	49.8703	0.974189	0.970631	1.09824	5.77566	5.77566
C_OM	6	94	2933.33	297.44	6.6	8.05	3.33	13.7688	484.322	44.9307	0.914602	1.09128	1.03107	5.70713	5.70713
C_OM	7	97	1466.67	460.93	5.76	6.53	3.33	14.2083	242.162	69.6272	0.798198	0.885226	0.899839	3.43416	3.43416
C_OM	8	97	1711.11	479.61	5.84	8.48	3.44	14.2083	282.521	72.4489	0.809284	1.14957	0.912336	3.88848	3.88848
C_OM	9	102	1466.67	465.6	6.45	7.87	3.11	14.9407	242.162	70.3326	0.893815	1.06688	1.00763	3.45321	3.45321	4.88973	1.88915
C_INM	1	114	2200	530.99	6.91	8.92	3.27	16.6984	363.242	80.2103	0.95756	1.20922	1.07949	4.8432	4.8432
C_INM	2	111	2688.89	530.99	7.25	8.8	3.44	16.2589	443.963	80.2103	1.00468	1.19295	1.13261	5.68313	5.68313
C_INM	3	108	1955.56	502.97	6.87	8.81	3.71	15.8195	322.883	75.9776	0.952017	1.19431	1.07325	4.36768	4.36768
C_INM	4	91	1955.56	601.06	6.89	9.14	3.38	13.3294	322.883	90.7949	0.954789	1.23905	1.07637	4.49704	4.49704
C_INM	5	85	2444.44	596.39	6.74	10.72	3.27	12.4505	403.601	90.0895	0.934002	1.45324	1.05294	5.3259	5.3259
C_INM	6	108	2933.33	587.04	6.91	11.89	3.44	15.8195	484.322	88.6771	0.95756	1.61184	1.07949	6.19218	6.19218
C_INM	7	100	3177.78	479.61	6.87	9.47	3.38	14.6477	524.683	72.4489	0.952017	1.28378	1.07325	6.42861	6.42861
C_INM	8	79	2688.89	559.02	6.94	10.02	3.27	11.5717	443.963	84.4444	0.961717	1.35834	1.08418	5.67917	5.67917
C_INM	9	97	1711.11	507.64	6.83	10.57	3.44	14.2083	282.521	76.6831	0.946474	1.4329	1.067	3.93874	3.93874	5.21729	0.856961
M_Control	1	56	1955.56	689.81	4.41	22.78	3.38	8.20271	322.883	104.201	0.61112	3.08813	0.688939	4.59526	4.59526
M_Control	2	67	2933.33	661.78	5.04	22.5	3.27	9.81396	484.322	99.9672	0.698423	3.05017	0.787359	6.25668	6.25668
M_Control	3	64	2688.89	647.77	4.22	20.83	3.22	9.37453	443.963	97.8508	0.584791	2.82378	0.659257	5.80326	5.80326
M_Control	4	61	2933.33	577.7	4.5	19.44	3.93	8.9351	484.322	87.2662	0.623592	2.63534	0.702999	6.10875	6.10875
M_Control	5	64	3177.78	610.4	5.56	20.2	3.55	9.37453	524.683	92.2058	0.770483	2.73837	0.868594	6.59115	6.59115
M_Control	6	85	2200	521.65	4.2	18.92	3.76	12.4505	363.242	78.7994	0.582019	2.56485	0.656132	4.78987	4.78987
M_Control	7	76	1466.67	759.87	4.37	20.17	3.38	11.1323	242.162	114.784	0.605577	2.73431	0.68269	3.88902	3.88902
M_Control	8	67	1711.11	713.16	4.73	19.99	3.27	9.81396	282.521	107.729	0.655464	2.7099	0.73893	4.22417	4.22417
M_Control	9	79	977.78	703.82	4.77	18.7	3.27	11.5717	161.441	106.318	0.661008	2.53503	0.745179	2.96062	2.96062	5.02431	1.23407
M_IC	1	56	3177.78	717.83	6.05	24.65	3.55	8.20271	524.683	108.434	0.838385	3.34163	0.945143	6.75632	6.75632
M_IC	2	73	3177.78	657.11	4.6	25.31	3.98	10.6928	524.683	99.2617	0.63745	3.4311	0.718621	6.68295	6.68295
M_IC	3	67	3666.67	675.79	4.9	24.85	4.04	9.81396	605.404	102.083	0.679022	3.36874	0.765488	7.54718	7.54718
M_IC	4	82	1466.67	745.86	5.9	28.4	3.87	12.0111	242.162	112.668	0.817598	3.84999	0.92171	3.89246	3.89246
M_IC	5	85	1711.11	717.83	5.07	18.5	3.76	12.4505	282.521	108.434	0.70258	2.50792	0.792046	4.25803	4.25803
M_IC	6	79	1222.22	741.19	5.77	22.09	3.66	11.5717	201.801	111.963	0.799584	2.99459	0.901401	3.44932	3.44932
M_IC	7	82	1955.56	741.19	4.8	25.33	4.04	12.0111	322.883	111.963	0.665165	3.43381	0.749866	4.721	4.721
M_IC	8	79	2444.44	783.23	5.15	26.25	4.09	11.5717	403.601	118.313	0.713666	3.55853	0.804543	5.62879	5.62879
M_IC	9	94	1955.56	759.87	5.59	25.96	4.04	13.7688	322.883	114.784	0.77464	3.51922	0.873281	4.77219	4.77219	5.30092	1.42728
M_OM	1	102	1955.56	853.29	8.08	27.97	3.49	14.9407	322.883	128.896	1.11969	3.7917	1.26227	4.94244	4.94244
M_OM	2	120	1955.56	857.96	5.72	26.45	3.76	17.5772	322.883	129.602	0.792655	3.58564	0.89359	4.96795	4.96795
M_OM	3	105	1955.56	843.95	4.34	23.39	3.87	15.3801	322.883	127.485	0.60142	3.17082	0.678003	4.91428	4.91428
M_OM	4	97	2200	853.29	4.5	26.86	4.15	14.2083	363.242	128.896	0.623592	3.64122	0.702999	5.344	5.344
M_OM	5	97	4155.56	843.95	4.89	27.3	4.15	14.2083	686.125	127.485	0.677637	3.70087	0.763926	8.70569	8.70569
M_OM	6	100	2688.89	848.62	4.89	21.67	4.2	14.6477	443.963	128.191	0.677637	2.93765	0.763926	6.17872	6.17872
M_OM	7	85	2933.33	857.96	5.13	26.68	3.87	12.4505	484.322	129.602	0.710895	3.61682	0.801419	6.60016	6.60016
M_OM	8	91	2444.44	867.3	5.23	23.58	3.71	13.3294	403.601	131.013	0.724752	3.19658	0.817041	5.77636	5.77636
M_OM	9	82	3177.78	848.62	5.56	22.74	3.6	12.0111	524.683	128.191	0.770483	3.0827	0.868594	6.9984	6.9984	6.04756	1.2516
M_INM	1	108	3177.78	857.96	6.07	28.68	4.04	15.8195	524.683	129.602	0.841156	3.88795	0.948268	7.06294	7.06294
M_INM	2	108	1955.56	853.29	5.76	26.35	3.71	15.8195	322.883	128.896	0.798198	3.57209	0.899839	4.94219	4.94219
M_INM	3	94	2688.89	843.95	5.51	27.26	3.82	13.7688	443.963	127.485	0.763554	3.69545	0.860783	6.172	6.172
M_INM	4	91	3911.11	848.62	6.05	28.31	4.09	13.3294	645.763	128.191	0.838385	3.83779	0.945143	8.28705	8.28705
M_INM	5	102	3911.11	848.62	6.1	26.01	4.2	14.9407	645.763	128.191	0.845314	3.52599	0.952954	8.30079	8.30079
M_INM	6	100	2688.89	857.96	5.22	26.91	4.2	14.6477	443.963	129.602	0.723367	3.648	0.815479	6.20191	6.20191
M_INM	7	123	2933.33	862.63	5.53	25.91	3.55	18.0167	484.322	130.307	0.766325	3.51244	0.863908	6.66585	6.66585
M_INM	8	111	3177.78	867.3	5.69	27.25	3.93	16.2589	524.683	131.013	0.788497	3.69409	0.888903	7.07908	7.07908
M_INM	9	126	1711.11	871.97	5.55	25.71	3.76	18.4561	282.521	131.718	0.769097	3.48532	0.867032	4.57585	4.57585	6.58752	1.2929
K_Control	1	56	488.89	222.71	4.89	1.54	2.29	8.20271	80.7206	33.6421	0.677637	0.208767	0.763926	1.29824	1.29824
K_Control	2	44	977.78	269.42	5.05	2.02	2.46	6.44499	161.441	40.698	0.699809	0.273837	0.788921	2.19844	2.19844
K_Control	3	47	977.78	292.77	4.86	2.31	2.56	6.88442	161.441	44.2253	0.673479	0.313151	0.759239	2.23972	2.23972
K_Control	4	50	733.33	264.74	4.33	2.06	2.35	7.32385	121.08	39.9911	0.600034	0.27926	0.676441	1.77624	1.77624
K_Control	5	38	733.33	250.73	4.89	2.62	2.56	5.56613	121.08	37.8748	0.677637	0.355175	0.763926	1.73827	1.73827
K_Control	6	59	977.78	246.06	4.59	3.14	2.35	8.64214	161.441	37.1693	0.636064	0.425668	0.717059	2.18469	2.18469
K_Control	7	44	977.78	232.05	4.65	2.58	2.35	6.44499	161.441	35.053	0.644378	0.349753	0.726432	2.139	2.139
K_Control	8	41	488.89	288.1	4.59	2.36	2.51	6.00556	80.7206	43.5198	0.636064	0.319929	0.717059	1.37875	1.37875
K_Control	9	32	2688.89	302.11	4.75	2.29	2.24	4.68726	443.963	45.6361	0.658236	0.310439	0.742054	5.18391	5.18391	2.23748	1.16066
K_IC	1	56	977.78	283.43	5.55	2.06	3.06	8.20271	161.441	42.8144	0.769097	0.27926	0.867032	2.24053	2.24053
K_IC	2	50	488.89	208.69	5.98	2.52	2.95	7.32385	80.7206	31.5243	0.828684	0.341619	0.934208	1.27167	1.27167
K_IC	3	41	977.78	367.51	4.76	2.58	3.06	6.00556	161.441	55.5153	0.659622	0.349753	0.743617	2.34861	2.34861
K_IC	4	35	488.89	334.81	4.76	2.15	2.95	5.12669	80.7206	50.5757	0.659622	0.29146	0.743617	1.44354	1.44354
K_IC	5	70	2200	283.43	4.18	3.18	2.84	10.2534	363.242	42.8144	0.579248	0.43109	0.653008	4.36845	4.36845
K_IC	6	38	1466.67	451.58	5.44	3.16	3	5.56613	242.162	68.2148	0.753853	0.428379	0.849848	3.32332	3.32332
K_IC	7	44	1711.11	278.76	4.64	2.21	2.78	6.44499	282.521	42.1089	0.642993	0.299594	0.72487	3.47766	3.47766
K_IC	8	47	244.44	339.48	4.84	2.48	2.89	6.88442	40.3595	51.2812	0.670708	0.336196	0.756114	1.04816	1.04816
K_IC	9	50	1222.22	297.44	4.44	2.48	2.89	7.32385	201.801	44.9307	0.615277	0.336196	0.693626	2.67245	2.67245	2.46604	1.11619
K_OM	1	59	1222.22	297.44	4.71	2.6	3.27	8.64214	201.801	44.9307	0.652693	0.352464	0.735806	2.68723	2.68723
K_OM	2	64	2444.44	260.07	5.38	2.36	2.78	9.37453	403.601	39.2857	0.745539	0.319929	0.840474	4.74674	4.74674
K_OM	3	67	2444.44	418.89	4.84	1.9	3.16	9.81396	403.601	63.2767	0.670708	0.25757	0.756114	4.99975	4.99975
K_OM	4	44	244.44	348.82	4.43	3.06	3.27	6.44499	40.3595	52.6921	0.613892	0.414823	0.692063	1.05787	1.05787
K_OM	5	38	977.78	330.14	4.76	2.19	3.38	5.56613	161.441	49.8703	0.659622	0.296883	0.743617	2.28447	2.28447
K_OM	6	59	1466.67	390.86	6.05	1.74	3.44	8.64214	242.162	59.0425	0.838385	0.23588	0.945143	3.25947	3.25947
K_OM	7	56	733.33	334.81	4.96	2.7	2.78	8.20271	121.08	50.5757	0.687337	0.36602	0.774861	1.8989	1.8989
K_OM	8	67	1222.22	353.49	5.69	4.8	3.06	9.81396	201.801	53.3975	0.788497	0.650702	0.888903	2.79411	2.79411
K_OM	9	76	1955.56	348.82	4.58	3.19	3	11.1323	322.883	52.6921	0.634678	0.432446	0.715497	4.0603	4.0603	3.08765	1.31382
K_INM	1	88	1466.67	414.22	6.33	2.39	2.95	12.89	242.162	62.5712	0.877186	0.323996	0.988885	3.34253	3.34253
K_INM	2	91	3177.78	320.8	6.03	2.35	2.84	13.3294	524.683	48.4594	0.835613	0.318573	0.942019	6.15142	6.15142
K_INM	3	102	2444.44	414.22	6.06	4.18	3	14.9407	403.601	62.5712	0.839771	0.566653	0.946705	5.05295	5.05295
K_INM	4	94	977.78	409.55	5.34	4.14	3.22	13.7688	161.441	61.8658	0.739996	0.561231	0.834225	2.50012	2.50012
K_INM	5	70	1955.56	348.82	5.7	4.1	3.27	10.2534	322.883	52.6921	0.789883	0.555808	0.890465	4.05585	4.05585
K_INM	6	64	977.78	115.27	4.48	4.26	3.33	9.37453	161.441	17.4125	0.62082	0.577498	0.699875	1.98711	1.98711
K_INM	7	56	2933.33	376.85	5.82	2.39	3.27	8.20271	484.322	56.9262	0.806512	0.323996	0.909212	5.76391	5.76391
K_INM	8	44	2200	381.52	4.2	2.35	3.06	6.44499	363.242	57.6316	0.582019	0.318573	0.656132	4.48239	4.48239
K_INM	9	38	1222.22	409.55	4.42	2.36	3.16	5.56613	201.801	61.8658	0.612506	0.319929	0.690501	2.83085	2.83085	4.01857	1.46552

## Sheet: SBQI5
		Actual values						Scoring based on scatter plot quadrants
Treatments	S NO	SOC	MBC	SLC	SPI	DHA	SIR	SOC/MBC	SOC/SLC	SOC/SIR	MBC/DHA	MBC/SPI	MBC/SIR	SBQI5	SBQI5	SD
C_Control	1	64	1711.11	339.48	5.1	4.63	2.18	1	1	1	1	1	1	1.759
C_Control	2	50	488.89	264.74	4.93	6.06	2.02	1	1	1	1	1	1	1.759
C_Control	3	56	733.33	232.05	5.34	5.23	1.8	1	1	1	1	1	1	1.759
C_Control	4	53	1955.56	171.32	5.38	5.15	2.84	2	1	1	3	3	3	3.388
C_Control	5	47	1466.67	255.4	5.27	5.75	2.73	1	1	1	1	1	1	1.759
C_Control	6	53	2444.44	157.31	5.68	4.87	2.84	2	1	1	3	4	3	3.488
C_Control	7	56	488.89	194.68	5.42	5.04	2.29	1	1	1	1	1	1	1.759
C_Control	8	64	244.44	213.36	5.34	5.1	2.46	1	1	1	1	1	1	1.759
C_Control	9	47	244.44	222.71	5.55	5.4	2.4	1	1	1	1	2	1	1.859	2.14322	0.735225
C_IC	10	76	1466.67	334.81	5.6	7.35	2.67	3	3	3	1	1	1	3.885
C_IC	11	44	3422.22	386.19	5.56	7.79	3.27	2	1	2	3	4	4	4.234
C_IC	12	50	1955.56	367.51	5.42	7.15	2.24	2	1	1	3	4	3	3.488
C_IC	13	29	2933.33	68.56	5.26	6.47	2.73	2	1	1	3	4	3	3.488
C_IC	14	50	244.44	246.06	5.22	6.74	3	1	1	1	1	1	1	1.759
C_IC	15	41	1466.67	316.13	5.6	6.21	2.29	1	1	1	1	2	1	1.859
C_IC	16	61	1955.56	213.36	6.52	6.59	3.11	2	1	2	1	4	3	3.379
C_IC	17	41	488.89	171.32	5.59	6.75	2.51	1	1	1	1	2	1	1.859
C_IC	18	41	244.44	199.35	4.75	6.47	2.29	1	1	1	1	1	1	1.759	2.85667	1.02621
C_OM	19	100	3911.11	306.78	6.85	7.59	3.27	4	3	3	3	4	4	5.951
C_OM	20	97	4155.56	372.18	6.75	8.54	3.11	4	3	3	3	4	3	5.614
C_OM	21	94	1711.11	348.82	7.24	7.77	3.11	4	3	3	1	2	1	4.222
C_OM	22	97	1222.22	260.07	7.15	13.71	3.22	4	3	4	2	2	1	4.89
C_OM	23	105	2933.33	330.14	7.03	7.16	3.49	4	3	4	3	4	4	6.36
C_OM	24	94	2933.33	297.44	6.6	8.05	3.33	4	3	4	3	4	4	6.36
C_OM	25	97	1466.67	460.93	5.76	6.53	3.33	3	4	4	1	2	3	5.485
C_OM	26	97	1711.11	479.61	5.84	8.48	3.44	4	3	4	1	2	2	4.968
C_OM	27	102	1466.67	465.6	6.45	7.87	3.11	3	3	3	1	2	1	3.985	5.315	0.863961
C_INM	28	114	2200	530.99	6.91	8.92	3.27	4	4	4	3	4	4	6.777
C_INM	29	111	2688.89	530.99	7.25	8.8	3.44	4	4	4	3	4	4	6.777
C_INM	30	108	1955.56	502.97	6.87	8.81	3.71	4	4	4	3	2	2	5.903
C_INM	31	91	1955.56	601.06	6.89	9.14	3.38	4	4	4	1	4	4	6.259
C_INM	32	85	2444.44	596.39	6.74	10.72	3.27	4	4	4	3	4	4	6.777
C_INM	33	108	2933.33	587.04	6.91	11.89	3.44	4	4	4	4	4	4	7.036
C_INM	34	100	3177.78	479.61	6.87	9.47	3.38	4	4	4	3	4	4	6.777
C_INM	35	79	2688.89	559.02	6.94	10.02	3.27	4	4	4	3	4	3	6.44
C_INM	36	97	1711.11	507.64	6.83	10.57	3.44	3	4	4	1	2	2	5.148	6.43267	0.591545
M_Control	37	56	1955.56	689.81	4.41	22.78	3.38	2	2	2	4	3	2	4.136
M_Control	38	67	2933.33	661.78	5.04	22.5	3.27	2	2	2	4	3	4	4.81
M_Control	39	64	2688.89	647.77	4.22	20.83	3.22	2	2	1	4	3	4	4.401
M_Control	40	61	2933.33	577.7	4.5	19.44	3.93	2	2	2	4	3	4	4.81
M_Control	41	64	3177.78	610.4	5.56	20.2	3.55	2	2	2	4	4	4	4.91
M_Control	42	85	2200	521.65	4.2	18.92	3.76	4	4	3	4	3	4	6.527
M_Control	43	76	1466.67	759.87	4.37	20.17	3.38	3	4	4	2	2	4	6.081
M_Control	44	67	1711.11	713.16	4.73	19.99	3.27	1	2	1	2	1	1	2.435
M_Control	45	79	977.78	703.82	4.77	18.7	3.27	3	4	4	2	1	1	4.97	4.78667	1.16493
M_IC	46	56	3177.78	717.83	6.05	24.65	3.55	2	2	2	4	4	4	4.91
M_IC	47	73	3177.78	657.11	4.6	25.31	3.98	4	4	2	4	3	4	6.118
M_IC	48	67	3666.67	675.79	4.9	24.85	4.04	2	2	2	4	3	4	4.81
M_IC	49	82	1466.67	745.86	5.9	28.4	3.87	3	4	4	2	2	2	5.407
M_IC	50	85	1711.11	717.83	5.07	18.5	3.76	3	4	4	2	1	2	5.307
M_IC	51	79	1222.22	741.19	5.77	22.09	3.66	3	4	4	2	2	2	5.407
M_IC	52	82	1955.56	741.19	4.8	25.33	4.04	3	4	4	4	3	4	6.699
M_IC	53	79	2444.44	783.23	5.15	26.25	4.09	4	4	4	4	3	4	6.936
M_IC	54	94	1955.56	759.87	5.59	25.96	4.04	3	4	4	4	3	2	6.025	5.73544	0.753084
M_OM	55	102	1955.56	853.29	8.08	27.97	3.49	4	4	4	4	4	4	7.036
M_OM	56	120	1955.56	857.96	5.72	26.45	3.76	4	4	4	4	4	2	6.362
M_OM	57	105	1955.56	843.95	4.34	23.39	3.87	4	4	4	4	1	2	6.062
M_OM	58	97	2200	853.29	4.5	26.86	4.15	4	4	4	4	3	4	6.936
M_OM	59	97	4155.56	843.95	4.89	27.3	4.15	4	4	4	4	3	4	6.936
M_OM	60	100	2688.89	848.62	4.89	21.67	4.2	4	4	4	4	3	4	6.936
M_OM	61	85	2933.33	857.96	5.13	26.68	3.87	4	4	4	4	3	4	6.936
M_OM	62	91	2444.44	867.3	5.23	23.58	3.71	4	4	4	4	3	4	6.936
M_OM	63	82	3177.78	848.62	5.56	22.74	3.6	4	4	4	4	4	4	7.036	6.79733	0.342837
M_INM	64	108	3177.78	857.96	6.07	28.68	4.04	4	4	4	4	4	4	7.036
M_INM	65	108	1955.56	853.29	5.76	26.35	3.71	4	4	4	2	4	4	6.518
M_INM	66	94	2688.89	843.95	5.51	27.26	3.82	4	4	4	4	4	4	7.036
M_INM	67	91	3911.11	848.62	6.05	28.31	4.09	4	4	4	4	4	4	7.036
M_INM	68	102	3911.11	848.62	6.1	26.01	4.2	4	4	4	4	4	4	7.036
M_INM	69	100	2688.89	857.96	5.22	26.91	4.2	4	4	4	4	3	4	6.936
M_INM	70	123	2933.33	862.63	5.53	25.91	3.55	4	4	4	4	4	4	7.036
M_INM	71	111	3177.78	867.3	5.69	27.25	3.93	4	4	4	4	4	4	7.036
M_INM	72	126	1711.11	871.97	5.55	25.71	3.76	3	4	4	2	2	2	5.407	6.78633	0.544399
K_Control	73	56	488.89	222.71	4.89	1.54	2.29	1	1	1	1	1	1	1.759
K_Control	74	44	977.78	269.42	5.05	2.02	2.46	1	1	1	1	1	1	1.759
K_Control	75	47	977.78	292.77	4.86	2.31	2.56	1	1	1	1	1	1	1.759
K_Control	76	50	733.33	264.74	4.33	2.06	2.35	1	1	1	1	1	1	1.759
K_Control	77	38	733.33	250.73	4.89	2.62	2.56	1	1	1	1	1	1	1.759
K_Control	78	59	977.78	246.06	4.59	3.14	2.35	1	1	1	1	1	1	1.759
K_Control	79	44	977.78	232.05	4.65	2.58	2.35	1	1	1	1	1	1	1.759
K_Control	80	41	488.89	288.1	4.59	2.36	2.51	1	1	1	1	1	1	1.759
K_Control	81	32	2688.89	302.11	4.75	2.29	2.24	2	1	1	3	3	3	3.388	1.94	0.543
K_IC	82	56	977.78	283.43	5.55	2.06	3.06	1	1	1	1	2	1	1.859
K_IC	83	50	488.89	208.69	5.98	2.52	2.95	1	1	1	1	2	1	1.859
K_IC	84	41	977.78	367.51	4.76	2.58	3.06	1	1	1	1	1	2	2.096
K_IC	85	35	488.89	334.81	4.76	2.15	2.95	1	1	1	1	1	1	1.759
K_IC	86	70	2200	283.43	4.18	3.18	2.84	2	1	1	3	3	3	3.388
K_IC	87	38	1466.67	451.58	5.44	3.16	3	1	1	1	1	1	1	1.759
K_IC	88	44	1711.11	278.76	4.64	2.21	2.78	1	1	1	1	1	1	1.759
K_IC	89	47	244.44	339.48	4.84	2.48	2.89	1	1	1	1	1	1	1.759
K_IC	90	50	1222.22	297.44	4.44	2.48	2.89	1	1	1	1	1	1	1.759	1.99967	0.532204
K_OM	91	59	1222.22	297.44	4.71	2.6	3.27	1	1	1	1	1	2	2.096
K_OM	92	64	2444.44	260.07	5.38	2.36	2.78	2	1	1	3	4	3	3.488
K_OM	93	67	2444.44	418.89	4.84	1.9	3.16	2	1	1	3	3	3	3.388
K_OM	94	44	244.44	348.82	4.43	3.06	3.27	1	1	2	1	1	2	2.505
K_OM	95	38	977.78	330.14	4.76	2.19	3.38	1	1	2	2	1	2	2.764
K_OM	96	59	1466.67	390.86	6.05	1.74	3.44	1	1	2	1	2	3	2.942
K_OM	97	56	733.33	334.81	4.96	2.7	2.78	1	1	1	1	1	1	1.759
K_OM	98	67	1222.22	353.49	5.69	4.8	3.06	1	1	1	1	2	1	1.859
K_OM	99	76	1955.56	348.82	4.58	3.19	3	4	3	3	3	3	3	5.514	2.92389	1.15217
K_INM	100	88	1466.67	414.22	6.33	2.39	2.95	3	3	3	3	2	1	4.503
K_INM	101	91	3177.78	320.8	6.03	2.35	2.84	4	3	3	3	4	3	5.614
K_INM	102	102	2444.44	414.22	6.06	4.18	3	4	3	3	3	4	3	5.614
K_INM	103	94	977.78	409.55	5.34	4.14	3.22	3	3	3	3	1	2	4.74
K_INM	104	70	1955.56	348.82	5.7	4.1	3.27	2	1	2	3	3	1	3.123
K_INM	105	64	977.78	115.27	4.48	4.26	3.33	1	1	2	1	1	2	2.505
K_INM	106	56	2933.33	376.85	5.82	2.39	3.27	2	1	2	3	4	3	3.897
K_INM	107	44	2200	381.52	4.2	2.35	3.06	2	1	1	3	3	3	3.388
K_INM	108	38	1222.22	409.55	4.42	2.36	3.16	1	1	2	1	1	1	2.168	3.95022	1.26164

## Sheet: PCA_HID
	-1.56046	-0.922067	-0.0845668	1.22626	1.17202	-0.444457
	-0.559027	-0.974264	0.0494147	1.14079	1.82436	0.394068
	2.93903	-0.450874	-0.218534	1.25237	-0.921813	-0.182224
	4.1725	-0.19159	-0.548637	1.22582	-0.987885	2.00569
	2.77829	-0.0960437	0.0946822	1.23442	-0.934026	-1.7295
	3.8564	-0.114	-0.205873
	5.00452	-0.115828	-0.288261
	5.59769	-0.0917912	-0.0329519
	-2.09736	-0.917086	-0.0167724
	-1.41671	-0.635981	0.0456883
	-0.232202	-0.503482	-0.050103
	1.03316	-0.516708	-0.0268224
	-2.10355	-0.458925	-0.238181
	-1.54925	-0.168191	0.123086
	-1.41275	0.449283	-0.0823528
	-1.91504	-0.60687	0.106153
	-0.625669	0.562367	0.131409
	-0.903431	0.0554421	0.136769
	0.103424	0.719267	0.409013
	-2.37928	-0.245252	-0.38729
	0.179541	1.38351	0.152948
	-1.63286	-0.10125	-0.139753
	-2.27449	-0.327251	-0.225284
	-1.70655	-0.044049	-0.204573
	-0.288631	1.02458	0.0391174
	0.254523	1.32572	0.208479
	-0.236209	0.260235	0.416351
	-1.77815	0.0115202	-0.267306
	-1.47425	-0.224652	0.00693857
	-0.837936	0.727957	-0.129242
	-1.21713	0.29852	-0.0751802
	-1.48302	0.505528	-0.324745
	0.731956	-0.484325	0.364019
	0.503556	1.13641	-0.0699451
	1.09206	-0.761721	0.45834
	-0.0488686	1.5595	0.122758
	1.4862	-1.06763	0.751209
