# Supplementary material for: Development of a soil biological quality index for soils of semi-arid tropics
Source: Copernicus journal article supplement (doi:10.5194/soil-6-483-2020), 2020-10-09
Supplement: Supplementary file 1 [file soil-6-483-2020-supplement.zip › soil-6-483-2020-supplement-title-page.pdf]

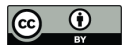

## *Supplement of*

# **Development of a soil biological quality index for soils of semi-arid tropics**

**Selvaraj Aravindh et al.**

*Correspondence to:* Dananjeyan Balachandar (dbalu@tnau.ac.in)

- soil-6-483-2020-supplement-title-page.pdf
- Aravind\_Spreadsheets for all SBQI.xlsx
- Aravind\_et\_al\_Supplementary Tables.docx

The copyright of individual parts of the supplement might differ from the CC BY 4.0 License.
